# Supplementary material
Source: PubMed Central journal article supplement (PMC7011197)

SUPPLEMENTARY DATA

**Supplementary Table S1. Baseline characteristics of participants that developed diabetes with missing data on age of diagnosis and diabetes risk among those with valid date of diabetes diagnosis**

**(a) Baseline characteristics**

|                                      | <b>Diabetes cases with missing data on date of diagnosis</b> | <b>Diabetes cases with data on date of diagnosis</b> | <b>P Value</b> |
|--------------------------------------|--------------------------------------------------------------|------------------------------------------------------|----------------|
| Number                               | 11,514                                                       | 31,646                                               |                |
| Age, years                           | 17.4 ± 0.4                                                   | 17.5 ± 0.4                                           | 0.867          |
| Male, number (%)                     | 7,458 (64.8)                                                 | 23,464 (74.1)                                        | <0.001         |
| Female, number (%)                   | 4,056 (35.2)                                                 | 8,182 (25.9)                                         |                |
| Male height, cm                      | 173.1 ± 6.9                                                  | 173.5 ± 7.0                                          | 0.001          |
| Female height, cm                    | 162.1 ± 6.2                                                  | 162.0 ± 6.3                                          | 0.436          |
| Male BMI, kg/m <sup>2</sup>          | 23.2 ± 4.2                                                   | 23.3 ± 4.2                                           | 0.112          |
| Female BMI, kg/m <sup>2</sup>        | 23.9 ± 4.4                                                   | 24.0 ± 4.4                                           | 0.208          |
| BMI categories, number (%)           |                                                              |                                                      | 0.186          |
| Underweight                          | 490 (4.3)                                                    | 1,469 (4.6)                                          |                |
| Normal weight                        | 7,784 (67.6)                                                 | 21,204 (67.0)                                        |                |
| Overweight and obese                 | 3,240 (28.1)                                                 | 8,973 (28.4)                                         |                |
| Completed high school education, %   | 67                                                           | 65                                                   | <0.001         |
| Residential socio-economic status, % |                                                              |                                                      | 0.005          |
| Low                                  | 30                                                           | 29                                                   |                |
| High                                 | 20                                                           | 20                                                   |                |
| Cognitive performance level, %       |                                                              |                                                      | <0.001         |
| Low                                  | 18                                                           | 20                                                   |                |
| Medium                               | 72                                                           | 69                                                   |                |
| High                                 | 10                                                           | 11                                                   |                |
| Country of origin, %                 |                                                              |                                                      | <0.001         |
| Israel                               | 8                                                            | 6                                                    |                |
| Former U.S.S.R.                      | 12                                                           | 11                                                   |                |
| Asia                                 | 28                                                           | 27                                                   |                |
| Africa                               | 25                                                           | 27                                                   |                |
| Europe                               | 27                                                           | 27                                                   |                |
| Ethiopia                             | 1                                                            | 1                                                    |                |
| Period of enrollment, number (%)     |                                                              |                                                      | <0.001         |
| 1979-1988                            | 7,322 (63.6)                                                 | 21,946 (69.3)                                        |                |
| 1989-1998                            | 3,202 (27.8)                                                 | 7,845 (24.8)                                         |                |
| 1999-2008                            | 990 (8.6)                                                    | 1,855 (5.9)                                          |                |
| Unimpaired health, %                 | 80                                                           | 80                                                   | 0.472          |
| Duration of follow-up, years         | 29.3 ± 6.9                                                   | 30.2 ± 6.3                                           | <0.001         |
| Age at end of follow-up, years       | 46.8 ± 6.9                                                   | 47.7 ± 6.4                                           | <0.001         |

Comparison of baseline characteristics at late adolescence for participants who developed diabetes by missing data on the age of diabetes onset. Characteristics were clinically similar between groups.

\*Follow-up extended from initial medical assessment until December 31, 2016.

SUPPLEMENTARY DATA

**(b) Risk for incident diabetes when accounting only cases with valid date of diabetes diagnosis by the INDR as valid diabetes cases.**

|                                        | <b>Resolved acute pancreatitis</b> | <b>No history of pancreatic disease</b> |
|----------------------------------------|------------------------------------|-----------------------------------------|
| OR <sub>adjusted</sub>                 | 2.40                               | 1 (Reference)                           |
| 95% CI                                 | 1.25-4.61                          |                                         |
| <i>P</i> value                         | 0.009                              |                                         |
| OR <sub>adjusted</sub> (main analysis) | 2.10                               | 1 (Reference)                           |
| 95% CI                                 | 1.15-3.84                          |                                         |
| <i>P</i> value                         | 0.016                              |                                         |

Assessing the association between resolved acute pancreatitis and incident diabetes when considering only cases in the Israel National Diabetes Registry that included data on the time of diabetes onset as valid cases. Model was adjusted as in Figure 2, and the data of the main analysis shown in figure 2 are shown to facilitate comparison. As judged from this analysis the point estimates are similar (2.4 vs. 2.1).

SUPPLEMENTARY DATA

**Supplementary Table S2. Outcome variables and hazard ratios for diabetes using Cox proportional-hazards models\***

|                                                    | Resolved pancreatitis | No pancreatic disease |
|----------------------------------------------------|-----------------------|-----------------------|
| <b>Study follow-up<sup>†</sup></b>                 |                       |                       |
| Cumulative duration – person-years                 | 5,672                 | 39,590,849            |
| Mean duration, years                               | 20.3 ± 7.5            | 22.1 ± 8.1            |
| Incidence rate of diabetes per 10,000 person-years | 21.2                  | 8.2                   |
| Participants, n                                    | 280                   | 1,789,869             |
| Cases, n                                           | 12                    | 32,616                |
| HR minimally adjusted                              | 2.73                  | 1 (Reference)         |
| 95% CI                                             | 1.55 – 4.81           |                       |
| P value                                            | <0.001                |                       |
| Participants, n                                    | 274                   | 1,756,586             |
| Cases, n                                           | 12                    | 31,646                |
| HR adjusted                                        | 2.36                  | 1 (Reference)         |
| 95% CI                                             | 1.34 – 4.16           |                       |
| P value                                            | 0.003                 |                       |
| Time to diabetes diagnosis, years                  | 18.7 ± 5.0            | 23.2 ± 7.2            |

\*Plus-minus values are means ± SD

<sup>†</sup>Follow-up extended from initial medical assessment to diabetes diagnosis, death or December 31, 2016, whichever came first.

The risk for incident diabetes with a history of resolved pancreatitis was relatively similar to the odds ratios calculated in the main analysis when using Cox proportional-hazards models. Note that subjects who developed diabetes and for whom date of diabetes diagnosis was not available are not included in this table.

Models were adjusted for the same variables as in the main analysis presented in Figure 2.

SUPPLEMENTARY DATA

**Supplementary Table S3. Odds ratio for diabetes in adulthood, according to different cut-offs of age of diagnosis**

| Age of diagnosis       | Resolved Pancreatitis | No Pancreatic Disease |
|------------------------|-----------------------|-----------------------|
| <b>≤ 50 yr.</b>        |                       |                       |
| Participants, n        | 274                   | 1,756,586             |
| Cases, n               | 12                    | 30,125                |
| OR <sub>adjusted</sub> | 2.74                  | 1 (Reference)         |
| 95% CI                 | 1.46 – 5.11           |                       |
| P value                | 0.002                 |                       |
| <b>≤ 45 yr.</b>        |                       |                       |
| Participants, n        | 274                   | 1,756,586             |
| Cases, n               | 12                    | 23,672                |
| OR <sub>adjusted</sub> | 3.38                  | 1 (Reference)         |
| 95% CI                 | 1.83 – 6.27           |                       |
| P value                | <0.001                |                       |
| <b>≤ 40 yr.</b>        |                       |                       |
| Participants, n        | 274                   | 1,756,586             |
| Cases, n               | 11                    | 15,018                |
| OR <sub>adjusted</sub> | 4.65                  | 1 (Reference)         |
| 95% CI                 | 2.48 – 8.72           |                       |
| P value                | <0.001                |                       |
| <b>≤ 35 yr.</b>        |                       |                       |
| Participants, n        | 274                   | 1,756,586             |
| Cases, n               | 5                     | 7,618                 |
| OR <sub>adjusted</sub> | 3.82                  | 1 (Reference)         |
| 95% CI                 | 1.56 – 9.36           |                       |
| P value                | 0.003                 |                       |
| <b>≤ 30 yr.</b>        |                       |                       |
| Participants, n        | 274                   | 1,756,586             |
| Cases, n               | 2                     | 3,421                 |
| OR <sub>adjusted</sub> | 3.31                  | 1 (Reference)         |
| 95% CI                 | 0.82 – 13.37          |                       |
| P value                | 0.093                 |                       |

SUPPLEMENTARY DATA

**Supplementary Table S4. The association between chronic pancreatic disease and incident diabetes in adulthood**

|                                  | <b>Chronic pancreatic disease</b> | <b>No history of pancreatic disease</b> |
|----------------------------------|-----------------------------------|-----------------------------------------|
| Participants, n                  | 113                               | 1,801,716                               |
| Cases, n                         | 9                                 | 44,463                                  |
| OR <sub>minimally adjusted</sub> | 6.19                              | 1 (Reference)                           |
| 95% CI                           | 2.93 – 13.08                      |                                         |
| <i>P</i> value                   | 1.76*10 <sup>-6</sup>             |                                         |
| Participants, n                  | 110                               | 1,768,100                               |
| Cases, n                         | 9                                 | 43,160                                  |
| OR <sub>adjusted</sub>           | 5.67                              | 1 (Reference)                           |
| 95% CI                           | 2.62 – 12.25                      |                                         |
| <i>P</i> value                   | 1.01*10 <sup>-5</sup>             |                                         |

Logistic regression analysis was applied to assess the OR for diabetes among 113 participants with chronic pancreatic disease compared to the unexposed group that included all those that had no history of pancreatic disease. The chronic pancreatic disease group included those with two events or more of acute pancreatitis, chronic pancreatitis, or history of subtotal or partial pancreatectomy. Pre-specified minimally adjusted model includes age, sex and birth year. Fully multivariable model was additionally adjusted for BMI, cognitive performance level, education level, socioeconomic status and country of origin.

SUPPLEMENTARY DATA

**Supplementary Figure S1. Adjusted Cox proportional survival curves by resolved pancreatitis or no pancreatic disease.**

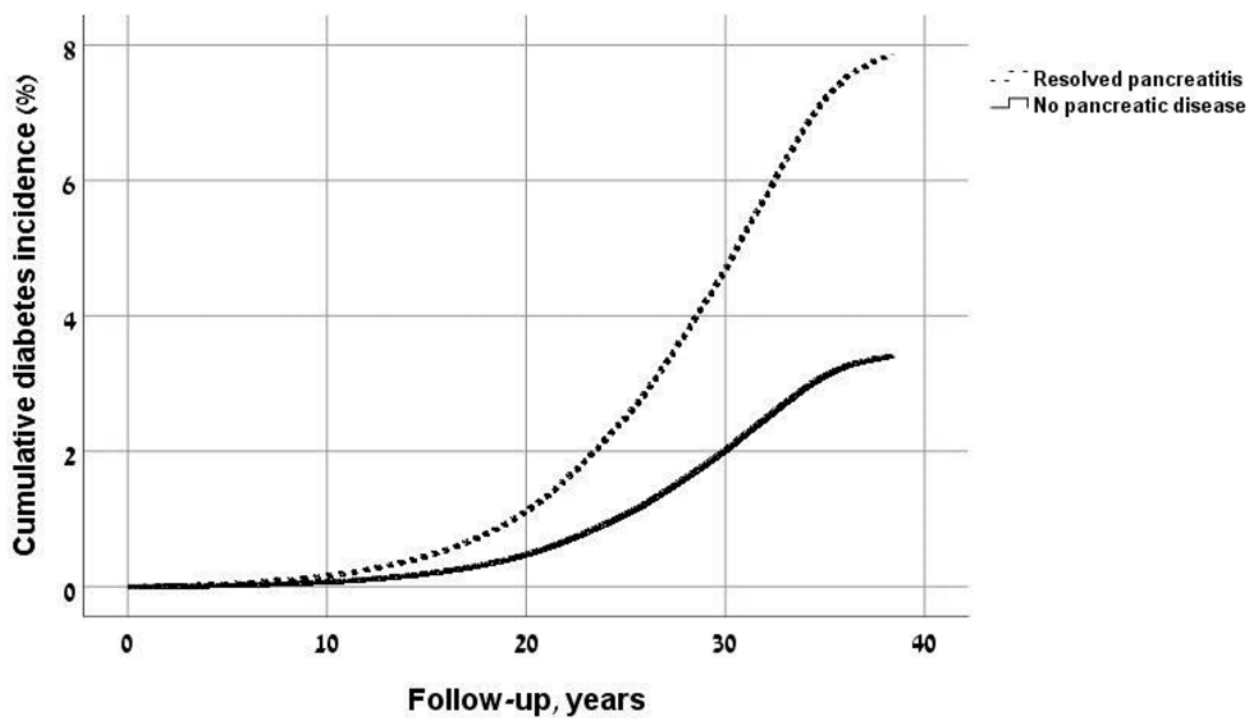

Supplement: DC191562SupplementaryData.pdf [file DC191562SupplementaryData.pdf]
